# Supplementary material for: Differential Regulations of Antioxidant Metabolism and Cold-Responsive Genes in Three Bermudagrass Genotypes under Chilling and Freezing Stress
Source: MDPI journal article supplement (doi:10.3390/ijms241814070), 2023-09-14
Supplement: s1 [file s1]

**Table S1** Primer sequences and annealing temperature of genes.

| Target gene      | Forward primer (5'-3')       | Reverse primer (5'-3')           | T <sub>m</sub> (°C) |
|------------------|------------------------------|----------------------------------|---------------------|
| <i>CdEIN3-1</i>  | GCAGCACTGCGACCCGCCGCA        | ACTTGGACTGCCGGACCAGGC            | 62                  |
| <i>CdEIN3-2</i>  | GTGGTTGCGTCTTCAGTTGTT        | GCACTTGAAGAGCTGACCATA            | 56                  |
| <i>CdCTR1</i>    | AGAAAGCTGTTGCTGGTGACG        | CTGCAGCAAGTGATAGATCAC            | 57                  |
| <i>CdHSFA-2b</i> | TGAGATGAGAAAGGAGCTCCAAGAGGCC | CAACAAAACAAAATCAGTTGCTGCCTAAAGGT | 62                  |
| <i>CdHSBP-1</i>  | ACCTCAAGGCTGAAATGG           | GCCACCAGCAACTGTAAT               | 55                  |
| <i>CdHSP22</i>   | AACACGGGAAAGCAAACG           | AGGAGGAGCAGCGCAAGGA              | 56                  |
| <i>CdHSP40</i>   | TAATAGGTGCAGGAAGCC           | TTTCACAGGGAACAAACC               | 56                  |
| <i>CdOSMOTIN</i> | GTGCCATTGTCCTTCTCTTG         | CGCAGGGATGGTTCTTAGAG             | 56                  |
| <i>CdISCS</i>    | ACGTCATGAAGCTGCAGATC         | CCATTTGTTTTCCCTTCACCC            | 56                  |
| <i>CdACTIN2</i>  | TCTGAAGGGTAAGTAGAGTAGTAG     | ACTCAGCACATTCCAGCAGAT            | 55                  |
